# Supplementary material for: Long aliphatic chain derivatives of trigonal lanthanide complexes
Source: Royal Society of Chemistry journal article supplement (doi:10.1039/d3dt01191g), 2023-01-01
Supplement: d3dt01191g1.pdf [file d3dt01191g1.pdf]

# Supporting Information

## for

# Long Aliphatic Chain Derivatives of Trigonal Lanthanide Complexes

*Yiwei Zhou, Christian D. Buch, Steen H. Hansen and Stergios Piligkos\**

Department of Chemistry, University of Copenhagen, Universitetsparken 5, DK-2100 Copenhagen  
(Denmark)

E-mail: [piligkos@chem.ku.dk](mailto:piligkos@chem.ku.dk)

## Contents

|                                                       |    |
|-------------------------------------------------------|----|
| Mass spectra.....                                     | 2  |
| Infrared spectroscopy.....                            | 4  |
| NMR spectrum.....                                     | 9  |
| Powder X-ray diffraction.....                         | 10 |
| Crystallographic Table.....                           | 12 |
| Crystal structures.....                               | 13 |
| Magnetic susceptibility.....                          | 20 |
| Variable-temperature-variable-field measurements..... | 21 |
| Ac susceptibility.....                                | 22 |

# Mass spectra

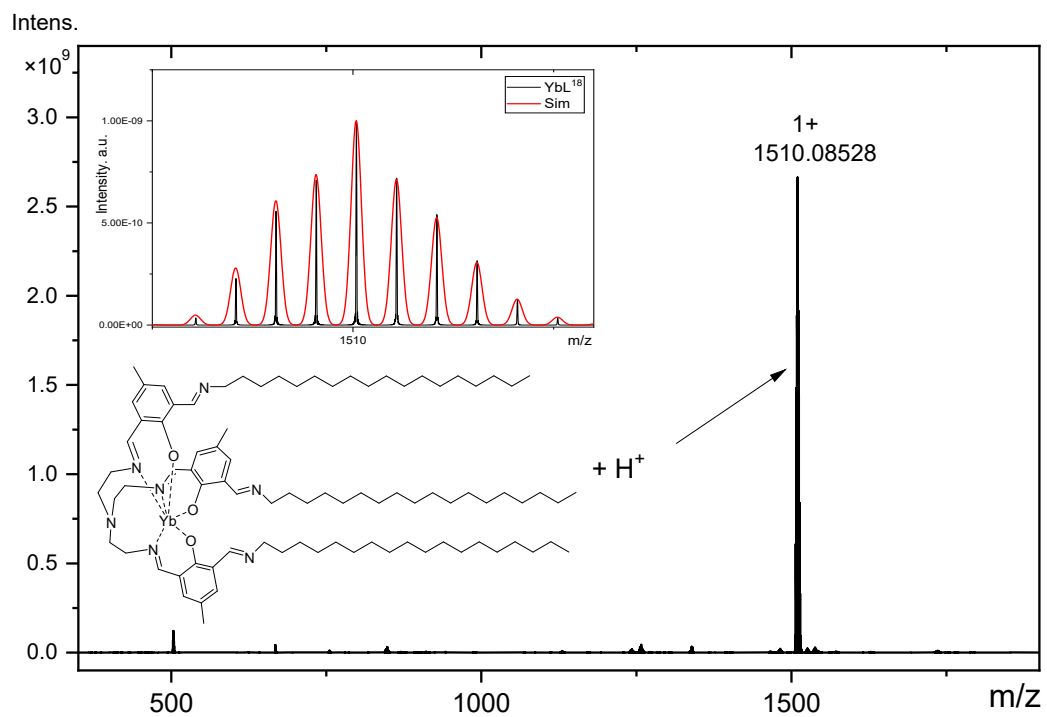

**Figure S1.** Positive ion mode MALDI mass spectrum of **1**.

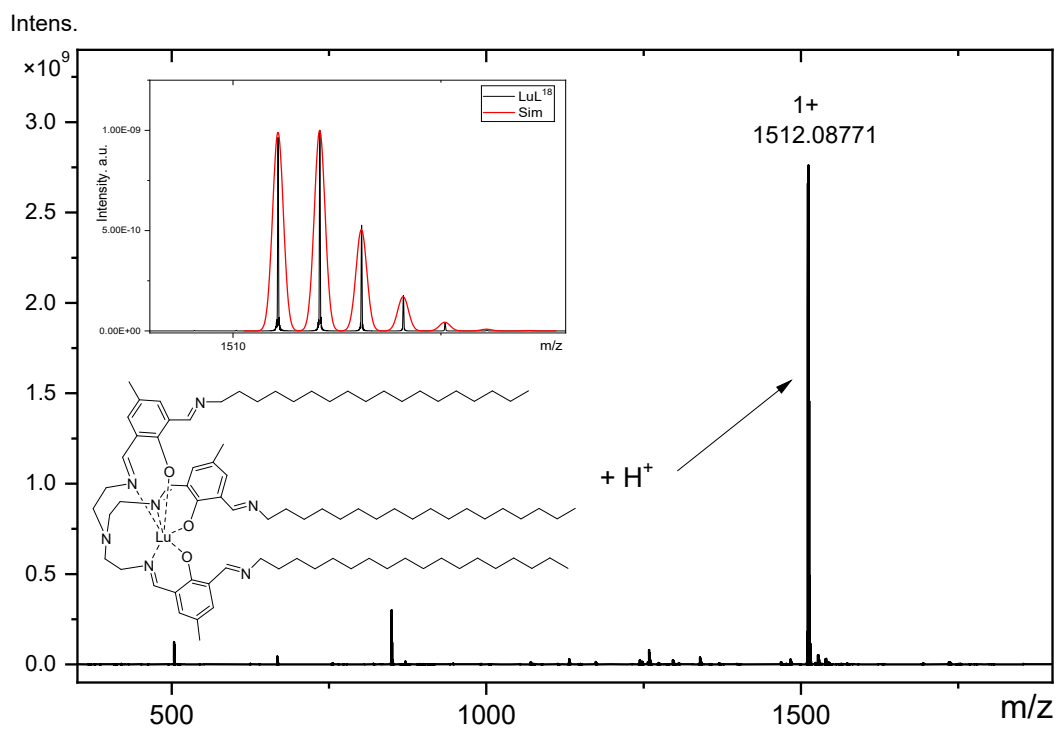

**Figure S2.** Positive ion mode MALDI mass spectrum of **2**.

## Infrared spectroscopy

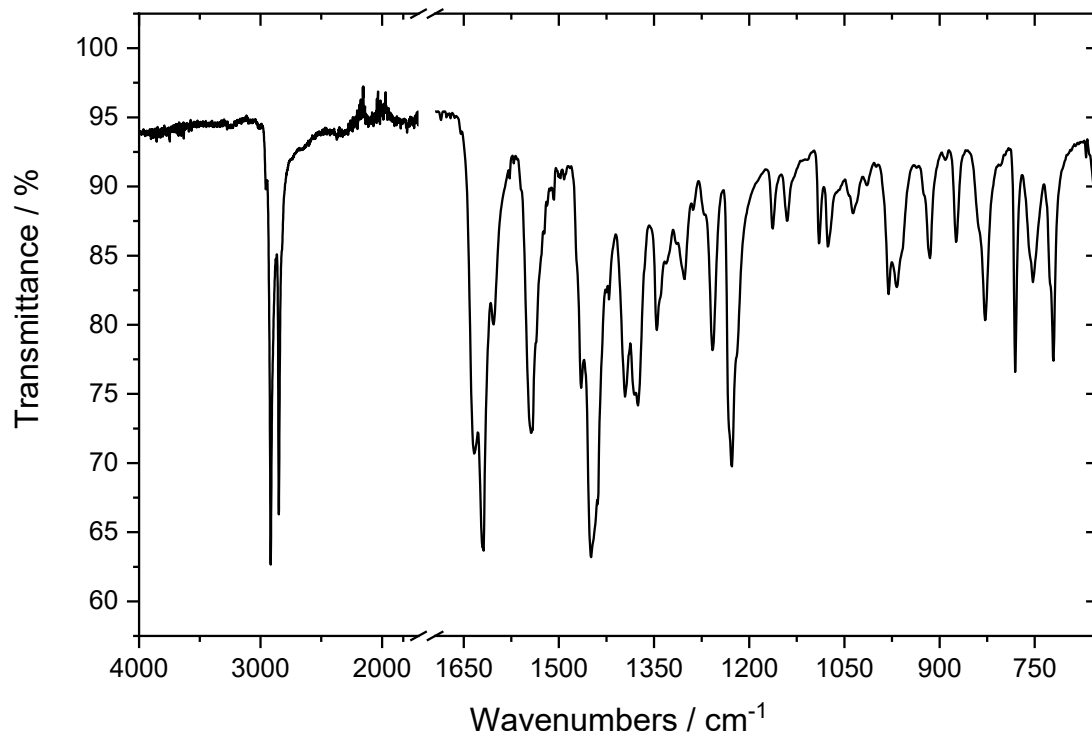

**Figure S3.** FTIR spectrum of **1**.

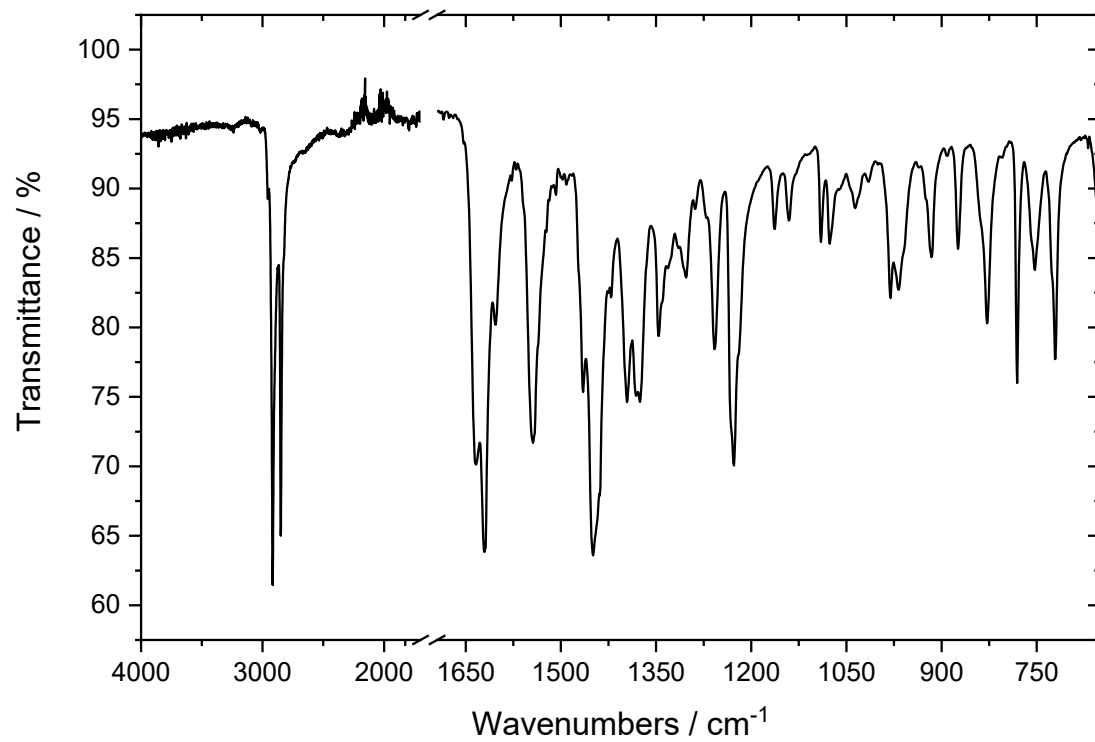

**Figure S4.** FTIR spectrum of **2**.

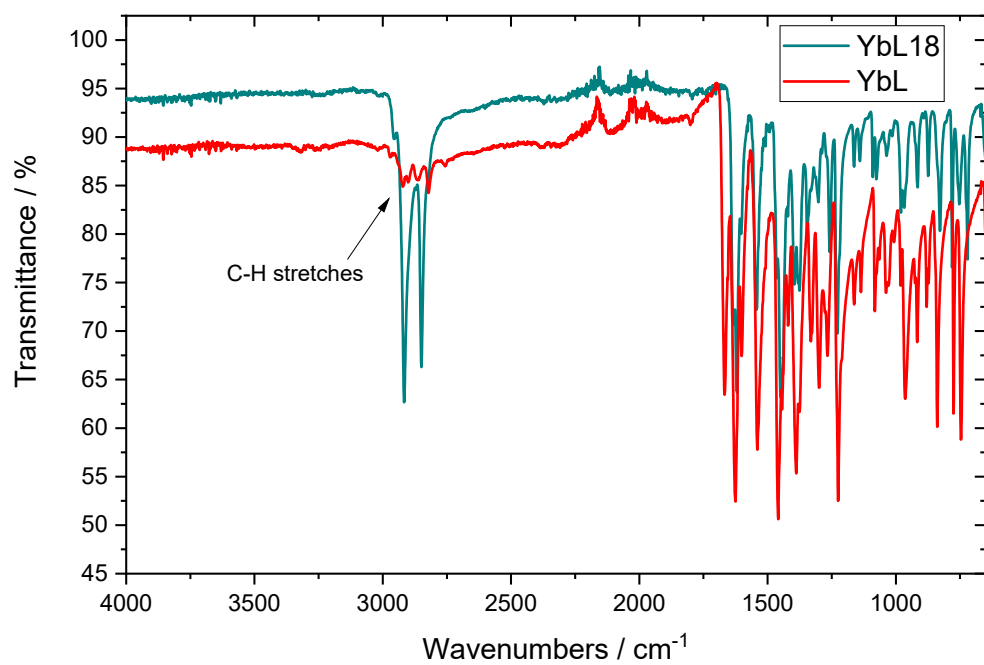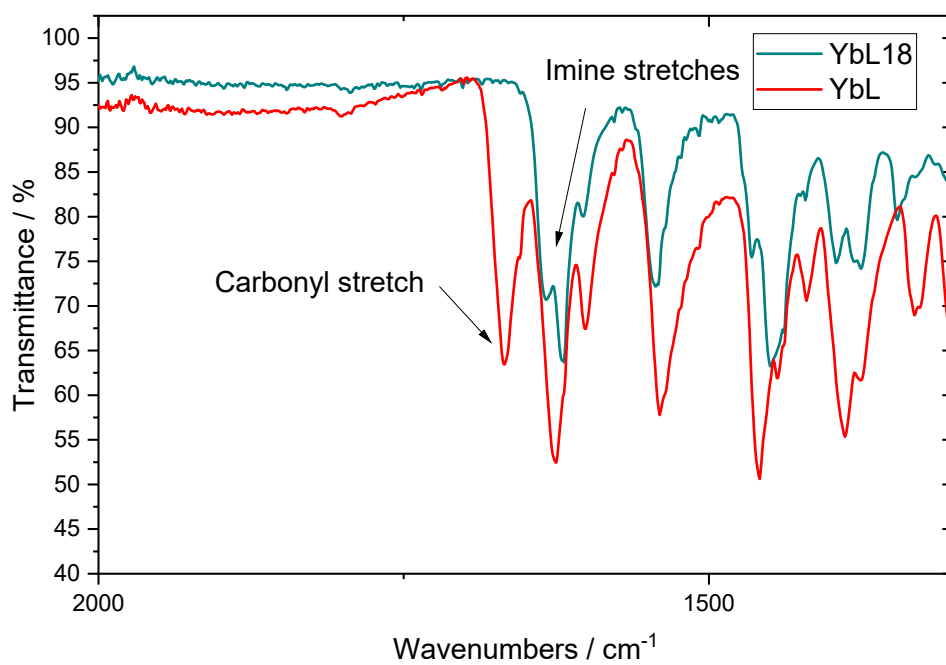

**Figure S5.** Top: FTIR spectra of a polycrystalline powder of **1** (cyan) and of a polycrystalline powder of **YbL** (red). Bottom: Enlargement of the range 2000-1300 cm<sup>-1</sup> of the FTIR spectra of a polycrystalline powder of **1** (cyan) and of a polycrystalline powder of **YbL** (red).

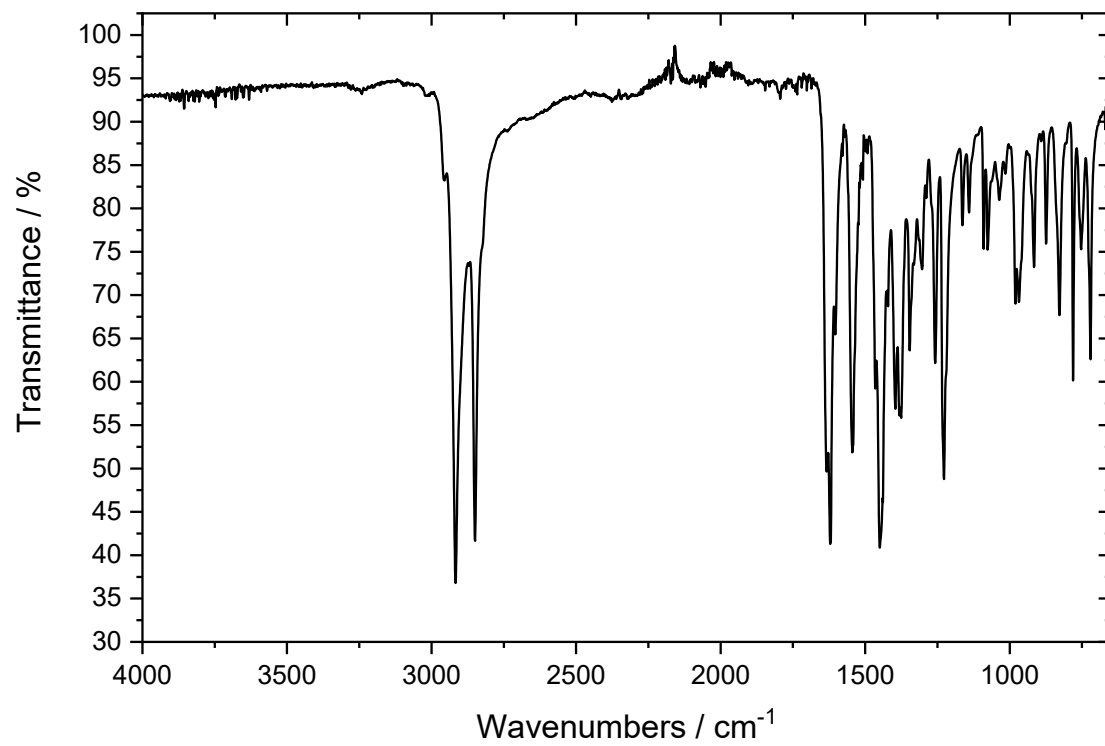

**Figure S6.** FTIR spectrum of **1'**.

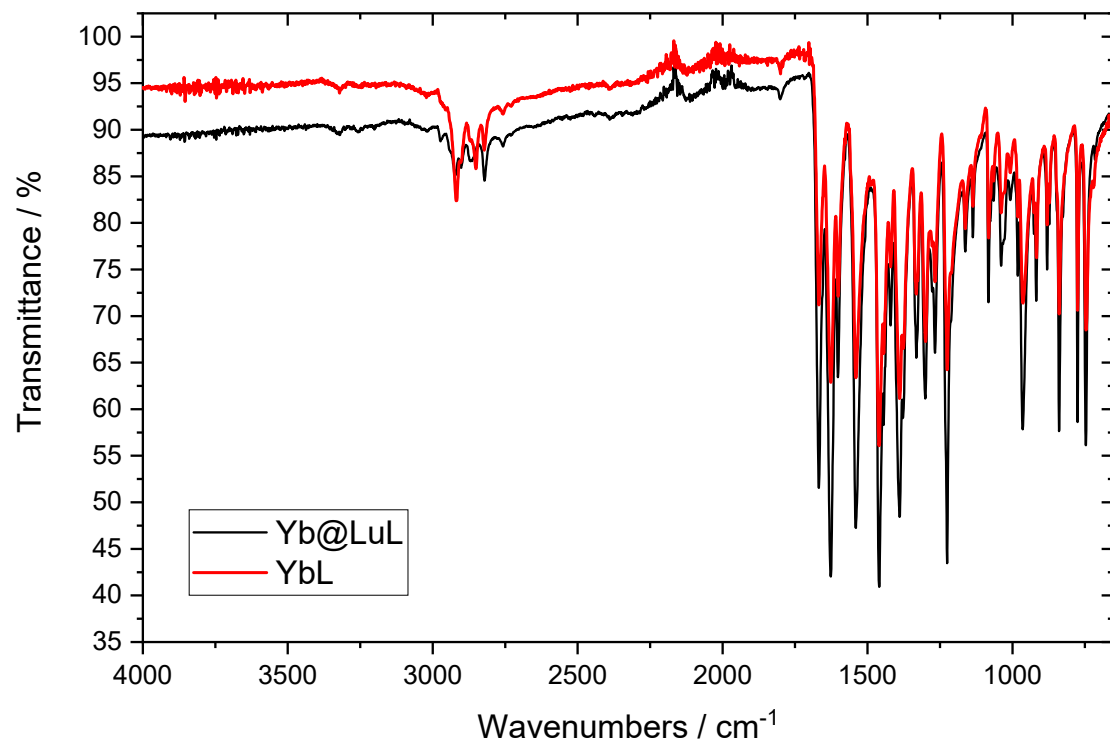

**Figure S7.** FTIR spectra of **Yb@LuL** at 4.2% dilution and **YbL**.



# NMR spectrum

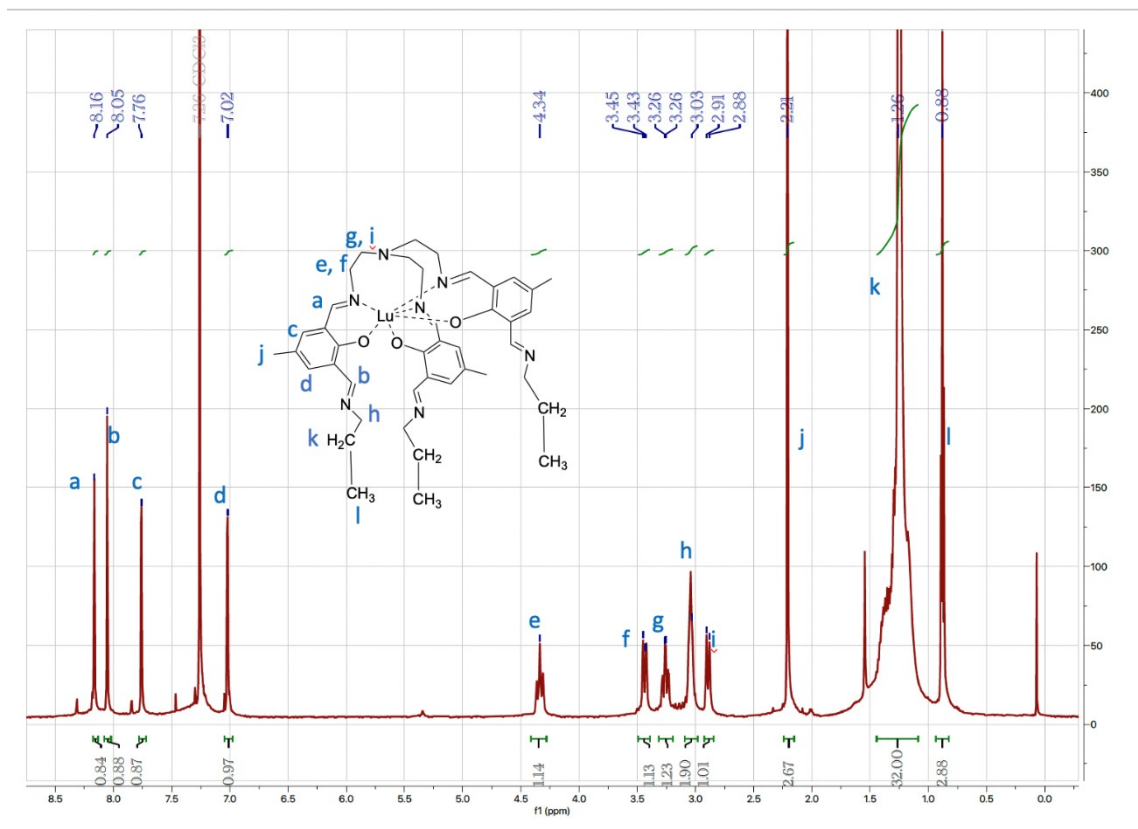

**Figure S8.** <sup>1</sup>H NMR of 2 in deuterated CDCl<sub>3</sub>, the peak at 1.55 ppm is from water in the CDCl<sub>3</sub> and the signal at 7.26 is from the deuterated solvent.

## Powder X-ray diffraction

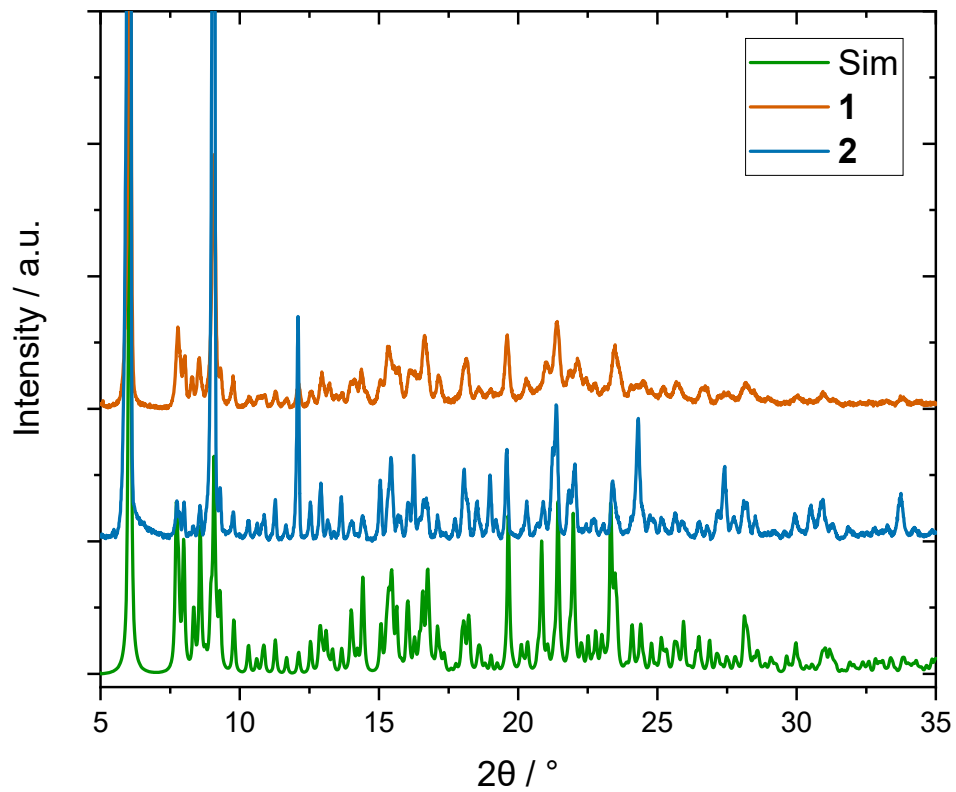

**Figure S9.** PXRD data for **1** and **2**. The simulated PXRD pattern was calculated from a crystal structure measured at room temperature.

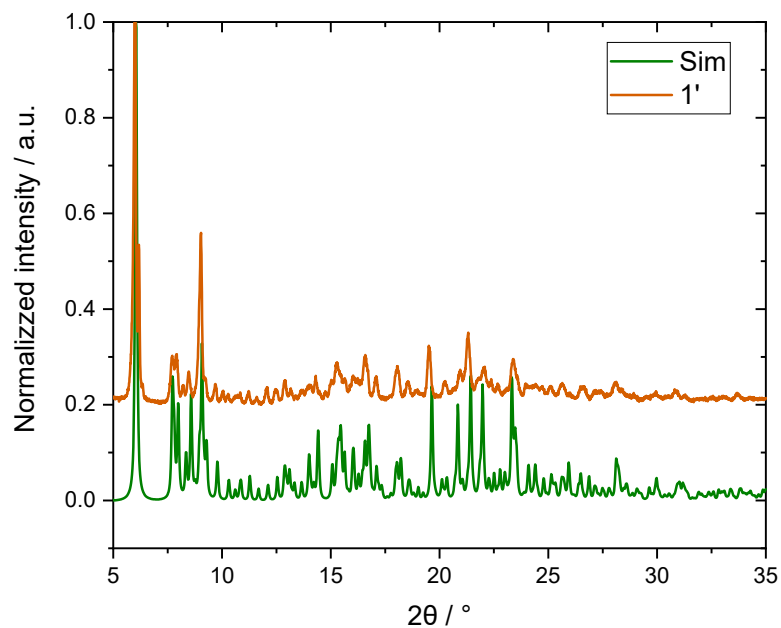

**Figure S10.** PXRD of **1'** complex. The simulated PXRD pattern was calculated from a crystal structure measured at room temperature.

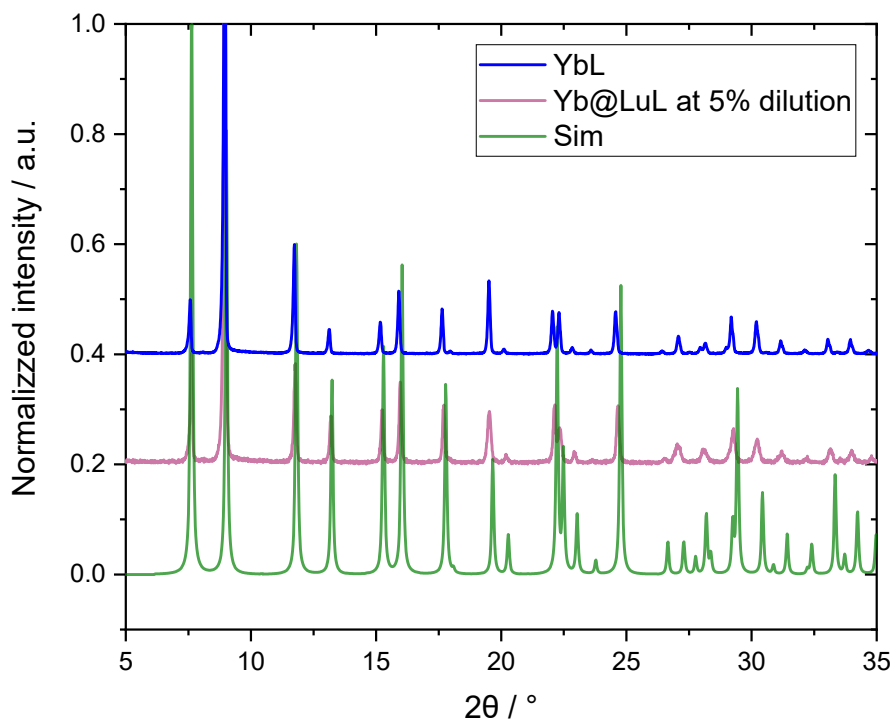

**Figure S11.** PXRD of **YbL** and **Yb@LuL** at 4.2% dilution. The simulated PXRD pattern was calculated from a crystal structure measured at room temperature.

## Crystallographic Table

**Table S1:** Crystallographic data of **1**.

|                                                         |                                                                               |
|---------------------------------------------------------|-------------------------------------------------------------------------------|
| <b>Complex</b>                                          | <b>1</b>                                                                      |
| <b>Empirical formula</b>                                | C <sub>87</sub> H <sub>144</sub> N <sub>7</sub> O <sub>3</sub> Yb             |
| <b>Formula weight</b>                                   | 1509.12                                                                       |
| <b>Temperature/K</b>                                    | 100                                                                           |
| <b>Crystal system</b>                                   | Triclinic                                                                     |
| <b>Space group</b>                                      | P $\bar{1}$                                                                   |
| <i>a</i> /Å                                             | 12.4294(8)                                                                    |
| <i>b</i> /Å                                             | 12.4635(8)                                                                    |
| <i>c</i> /Å                                             | 30.023(2)                                                                     |
| $\alpha$ /°                                             | 91.216(2)                                                                     |
| $\beta$ /°                                              | 98.672(2)                                                                     |
| $\gamma$ /°                                             | 115.930(2)                                                                    |
| <b>Volume/Å<sup>3</sup></b>                             | 4115.0(5)                                                                     |
| <b>Z</b>                                                | 2                                                                             |
| $\rho_{\text{calc}}$ g/cm <sup>3</sup>                  | 1.218                                                                         |
| $\mu$ /mm <sup>-1</sup>                                 | 1.187                                                                         |
| <b>F (000)</b>                                          | 1618.0                                                                        |
| <b>Crystal size/mm<sup>3</sup></b>                      | 0.43 × 0.183 × 0.05                                                           |
| $\lambda$ (MoK $\alpha$ )                               | 0.71073                                                                       |
| <b>2<math>\theta</math> range for data collection/°</b> | 4.028 to 51.364                                                               |
| <b>Index ranges</b>                                     | -15 ≤ <i>h</i> ≤ 15,<br>-15 ≤ <i>k</i> ≤ 15,<br>-36 ≤ <i>l</i> ≤ 36           |
| <b>Reflections collected</b>                            | 118800                                                                        |
| <b>Independent reflections</b>                          | 15615 [ <i>R</i> <sub>int</sub> = 0.0400, <i>R</i> <sub>sigma</sub> = 0.0221] |
| <b>Data/restraints/<br/>parameters</b>                  | 15615/0/889                                                                   |
| <b>Goodness-of-fit on <i>F</i><sup>2</sup></b>          | 1.071                                                                         |
| <b>Final <i>R</i> indexes [<i>I</i> ≥ 2σ(<i>I</i>)]</b> | <i>R</i> <sub>1</sub> = 0.0219,<br><i>wR</i> <sub>2</sub> = 0.0521            |
| <b>Final <i>R</i> indexes [all data]</b>                | <i>R</i> <sub>1</sub> = 0.0259, <i>wR</i> <sub>2</sub> = 0.0539               |
| <b>Largest diff. peak/hole / e Å<sup>-3</sup></b>       | 1.25/-0.74                                                                    |

## Crystal structures

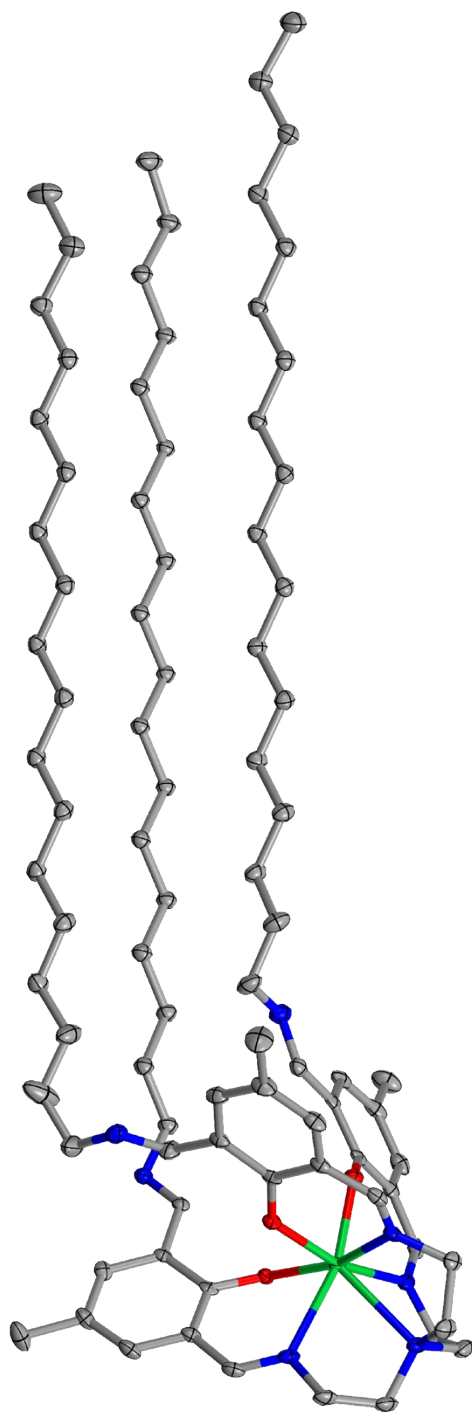

**Figure S12.** Solid state structure of **1** seen from the side. Colour code: Yb, green; N, blue; O, red; C, grey; H, white. All hydrogen atoms have been omitted for clarity. Thermal ellipsoids are set to 50% probability.

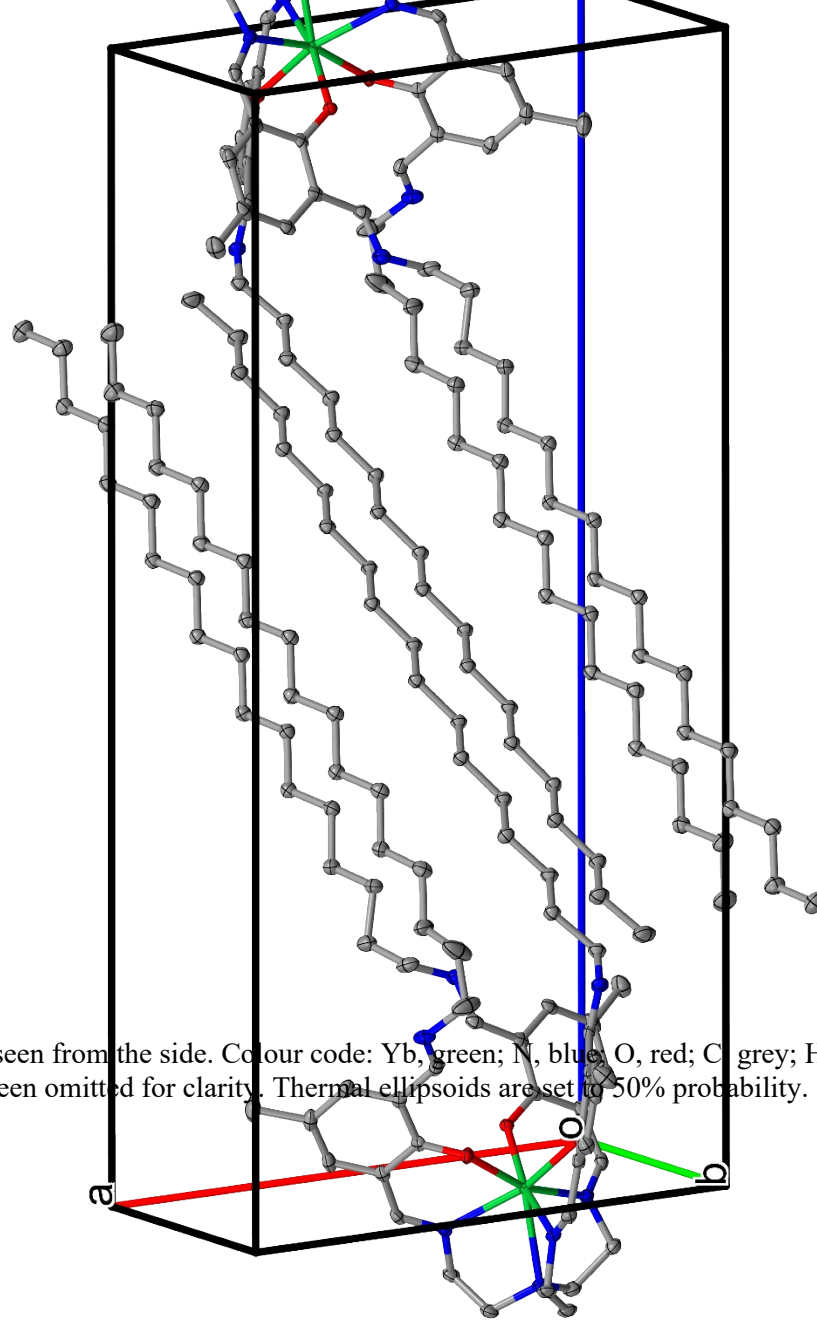

**Figure S13.** Unit cell of **1** seen from the side. Colour code: Yb, green; N, blue; O, red; C, grey; H, white. All hydrogen atoms have been omitted for clarity. Thermal ellipsoids are set to 50% probability.

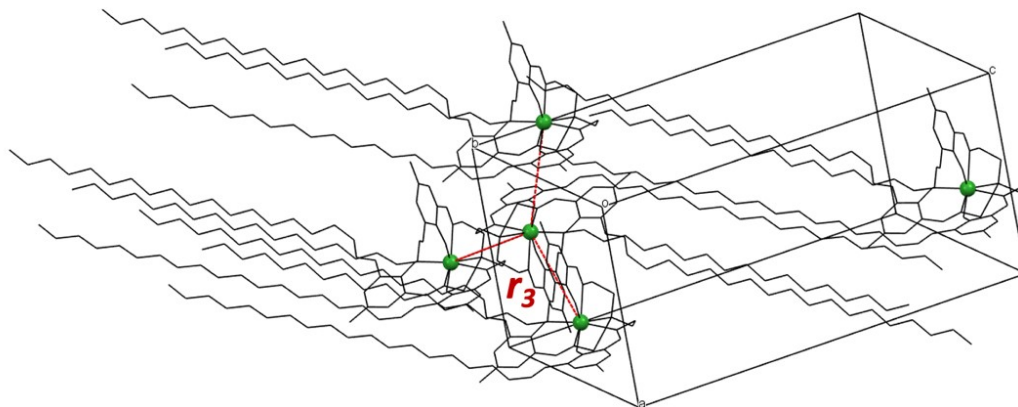

**Figure S14.** Illustration of the three closest neighbouring complexes in **1**.

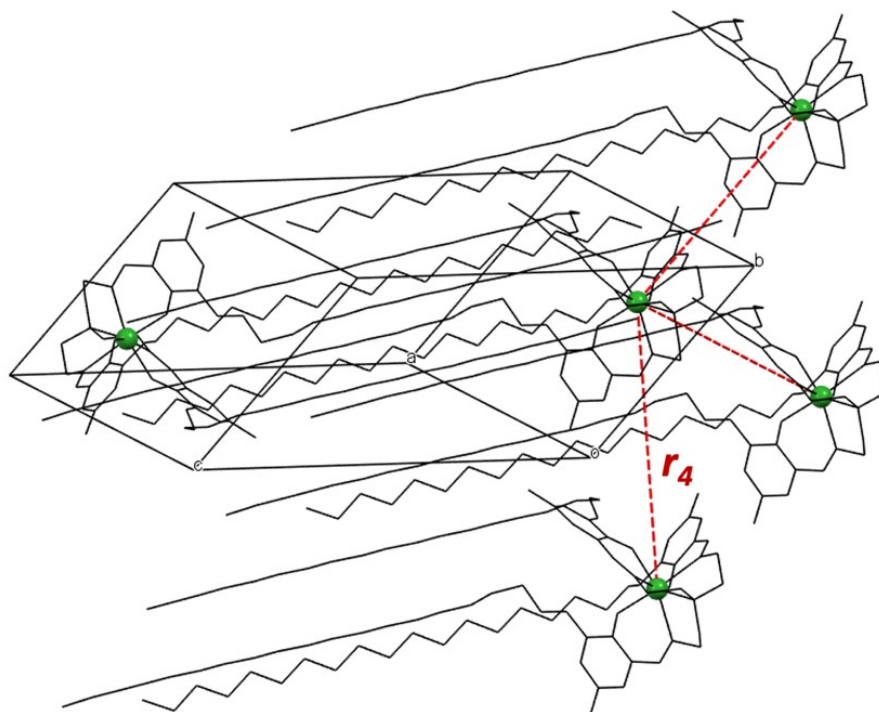

**Figure S15.** The distance of the closest neighbours with the chains pointing in the same direction in **1**.

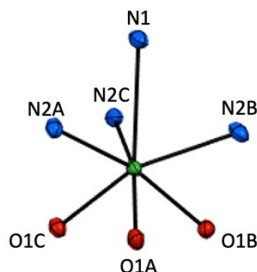

**Figure S16:** The distorted monocapped octahedral coordination environment around Yb(III) in **1**. Colour code: Yb, green; N, blue; O, red. Thermal ellipsoids are set to 50% probability.

**Table S2.** Comparison of selected bond lengths in **1**, YbL<sup>1</sup> and YbL derivatised with three benzylamine groups (Yb<sup>B</sup>L)<sup>1</sup>. The three phenoxide and imine groups are labelled according to Figure S16.

| Bond length / Å        | Ln-O1A     | Ln-O1B     | Ln-O1C     | Ln-N2A     | Ln-N2B      | Ln-N2C     | Ln-N1      |
|------------------------|------------|------------|------------|------------|-------------|------------|------------|
| <b>1</b>               | 2.1511(14) | 2.1552(13) | 2.1629(13) | 2.4173(16) | 2.4179 (16) | 2.4194(17) | 2.6124(16) |
| <b>YbL</b>             | 2.1600(15) | 2.1600(15) | 2.1600(15) | 2.421(1)   | 2.421(1)    | 2.421(1)   | 2.610(3)   |
| <b>Yb<sup>B</sup>L</b> | 2.1428(12) | 2.1590(16) | 2.1663(16) | 2.422(2)   | 2.423(2)    | 2.4259(16) | 2.616(2)   |

**Table S3.** Comparison of selected bond angles of **1**, YbL<sup>1</sup> and YbL derivatised with three benzylamine groups (Yb<sup>B</sup>L)<sup>1</sup>. The three phenoxide and imine groups are labelled according to Figure S16.

| Bond angle / °         | ∠N2A-N2B-N2C | ∠N2B-N2A-N2C | ∠N2A-N2C-N2B | ∠N1-Ln-N2A | ∠N1-Ln-N2B | ∠N1-Ln-N2C | ∠N1-Ln-O1A | ∠N1-Ln-O1B | ∠N1-Ln-O1C | ∠O1A-O1B-O1C | ∠O1B-O1A-O1C | ∠O1A-O1C-O1B |
|------------------------|--------------|--------------|--------------|------------|------------|------------|------------|------------|------------|--------------|--------------|--------------|
| <b>1</b>               | 61.34(5)     | 61.03(5)     | 57.62(5)     | 69.17(5)   | 69.19(5)   | 69.18(5)   | 127.97(6)  | 125.20(5)  | 127.42(5)  | 59.74(3)     | 61.11(3)     | 59.15(5)     |
| <b>YbL</b>             | 60.00        | 60.00        | 60.00        | 69.27(4)   | 69.27(4)   | 69.27(4)   | 127.02(4)  | 127.02(4)  | 127.02(4)  | 60.00        | 60.00        | 60.00        |
| <b>Yb<sup>B</sup>L</b> | 57.11(5)     | 61.26(5)     | 61.63(5)     | 68.96(7)   | 68.53(7)   | 69.37(7)   | 130.21(6)  | 125.20(7)  | 126.18(7)  | 59.09(5)     | 62.96(5)     | 57.95(5)     |



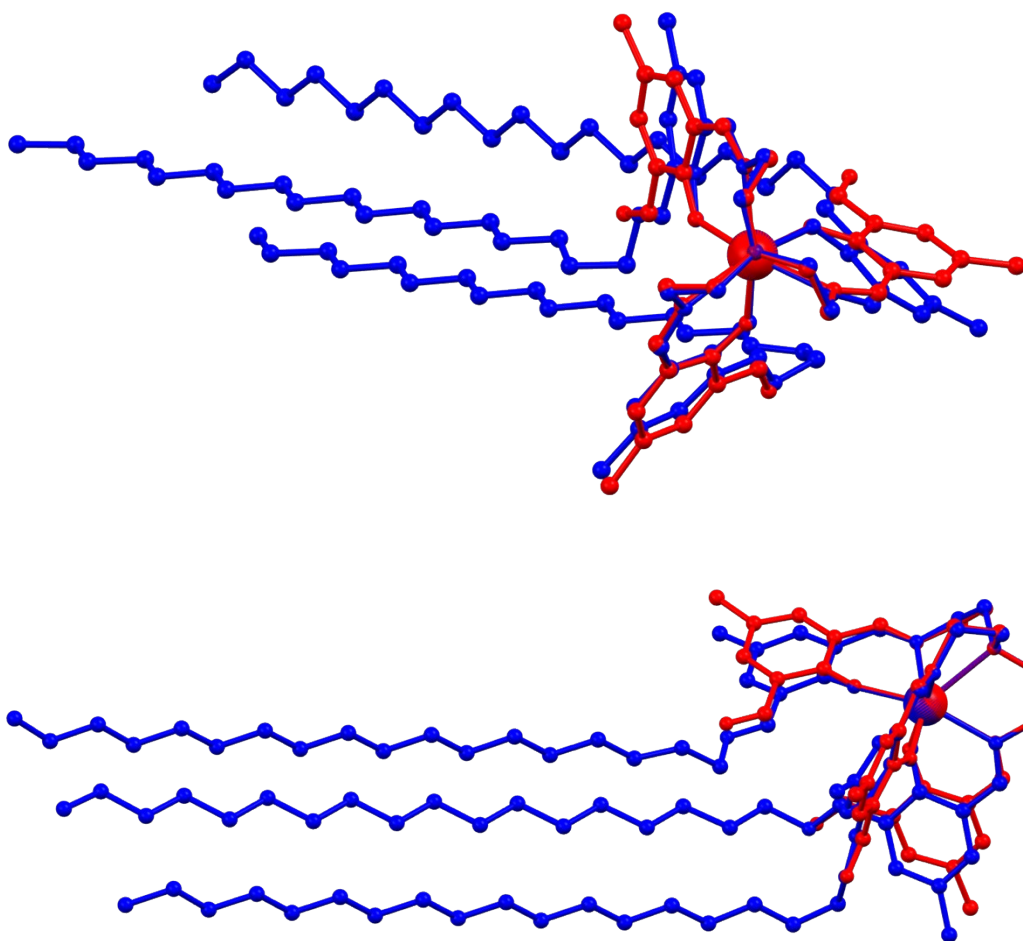

**Figure S17.** Structural overlay of **1** (blue) and YbL (red) seen from the top (top) and from the side (bottom). The crystal structure of YbL was obtained from literature.<sup>1</sup>

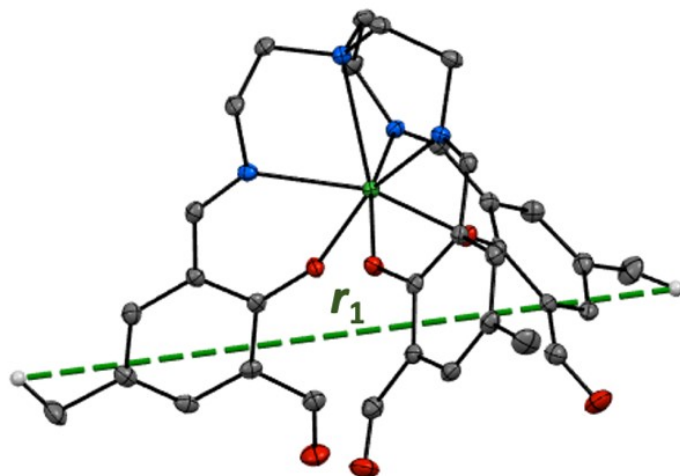

**Figure S18.** Solid state structure of **YbL** showing the longest intra molecular distance,  $r_1$ . Hydrogen atoms have been omitted for clarity except for the hydrogens which are part of  $r_1$ . Colour code: Yb, green; N, blue; O, red; C, grey; H, white. Thermal ellipsoids are set to 50% probability.

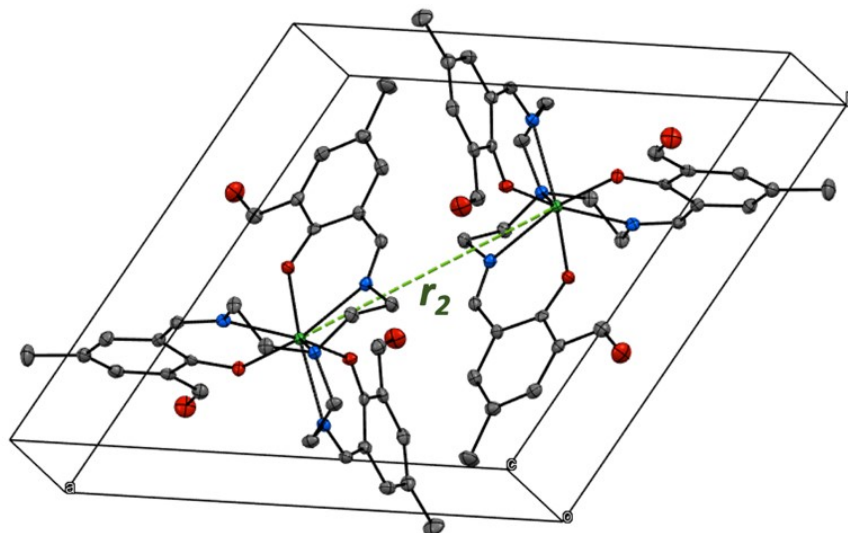

**Figure S19.** Unit cell of **YbL** with the distance between the two Yb(III) centres ( $r_2$ ). Hydrogen atoms have been omitted for clarity. Colour code: Yb, green; N, blue; O, red; C, grey. Thermal ellipsoids are set to 50% probability.

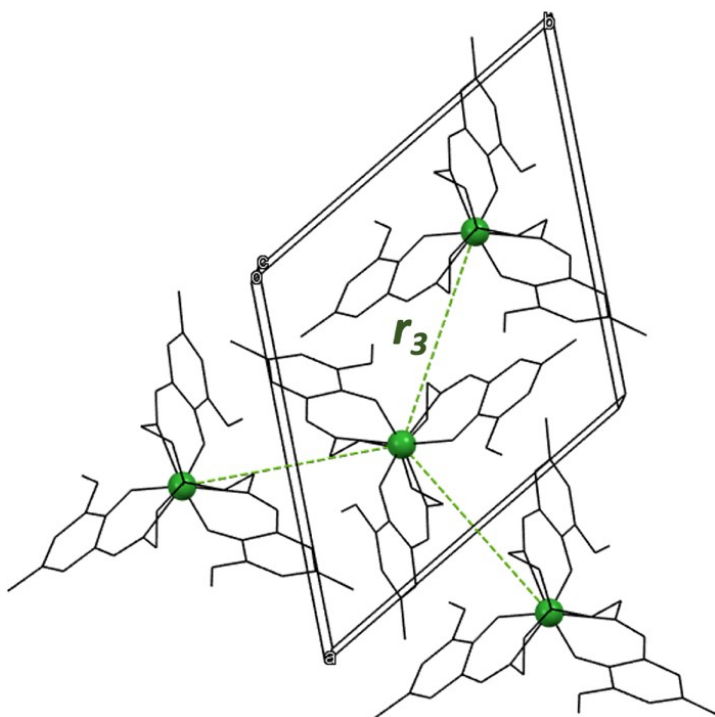

**Figure S20.** Illustration of the three closest neighbouring complexes in **YbL**.

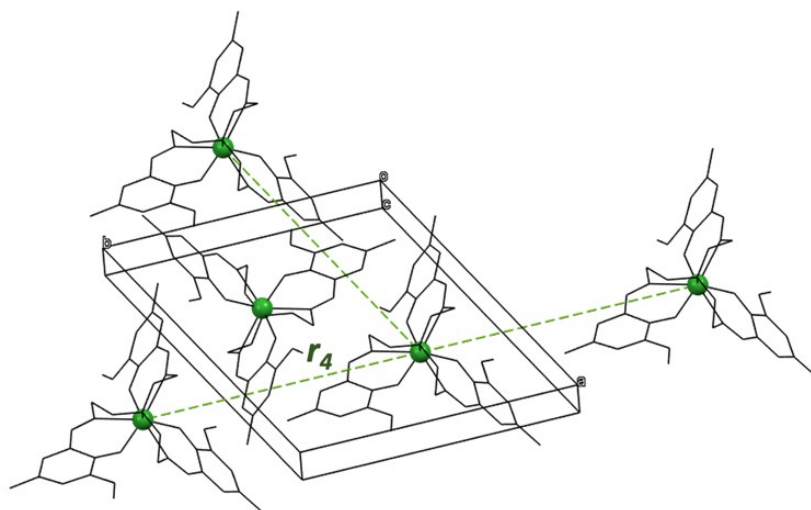

**Figure S21.** The distance to the closest neighbours with the chains pointing in the same direction in **YbL**.

## Magnetic susceptibility

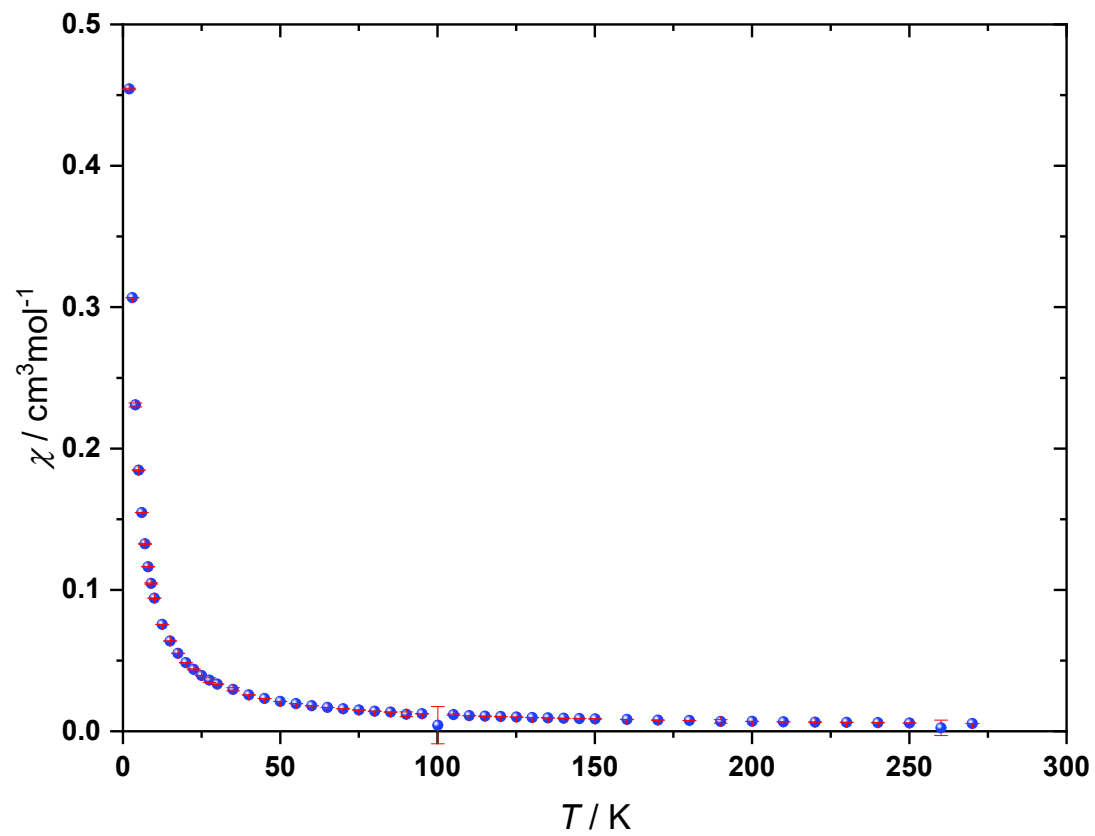

Figure S22. Temperature dependence of  $\chi$  (points) including errors (red bars) for **1**.

## Variable-temperature-variable-field measurements

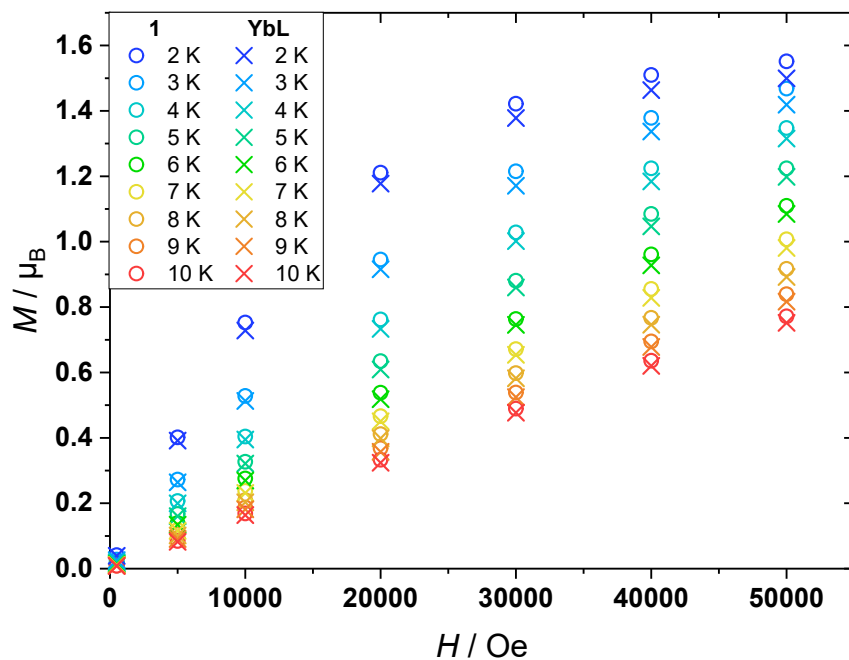

**Figure S23.** Comparison of VTVB measurements of **1** (circles) and YbL (crosses). The YbL values are obtained from literature.<sup>1</sup>

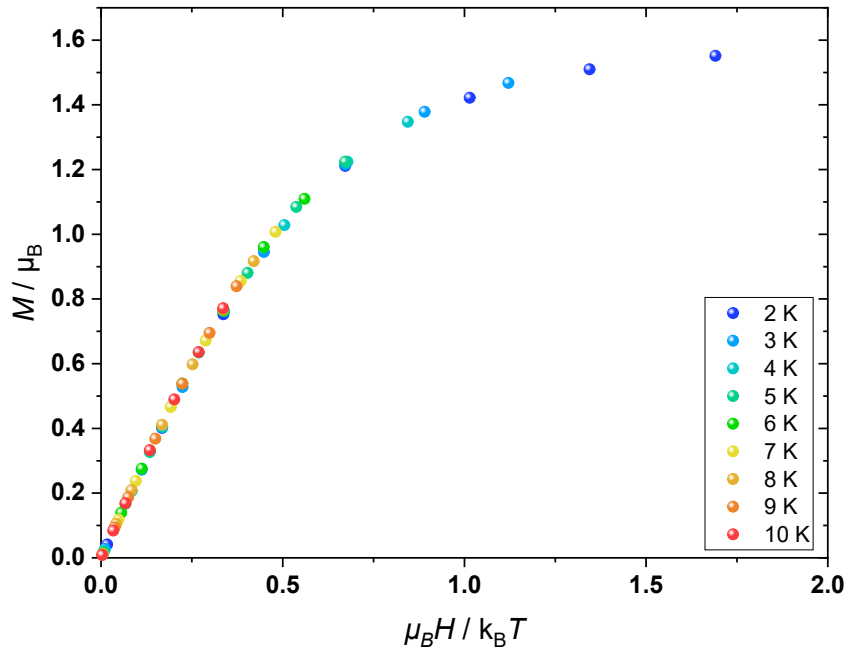

**Figure S24.** Reduced magnetization of **1**.

## Ac susceptibility

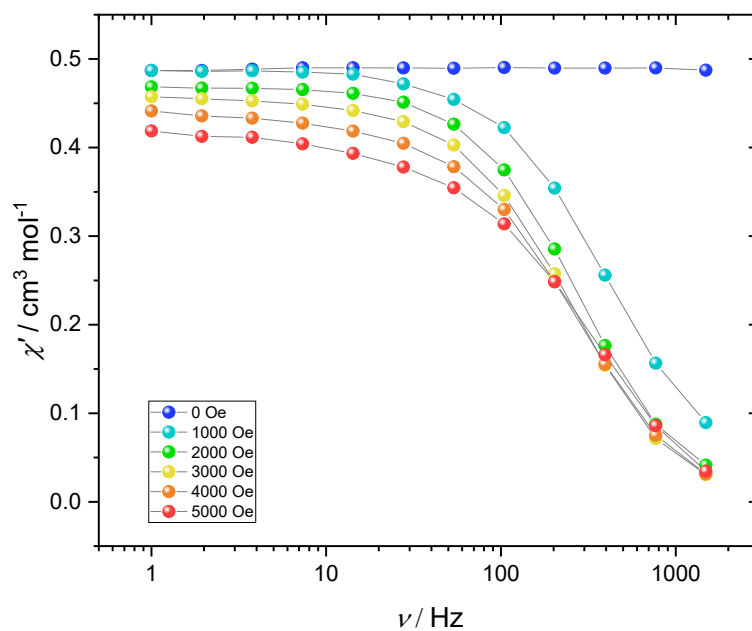

**Figure S25.** Field dependence of the in-phase signal of the ac magnetic susceptibility of **1**. Solid lines are guidelines for the eye.

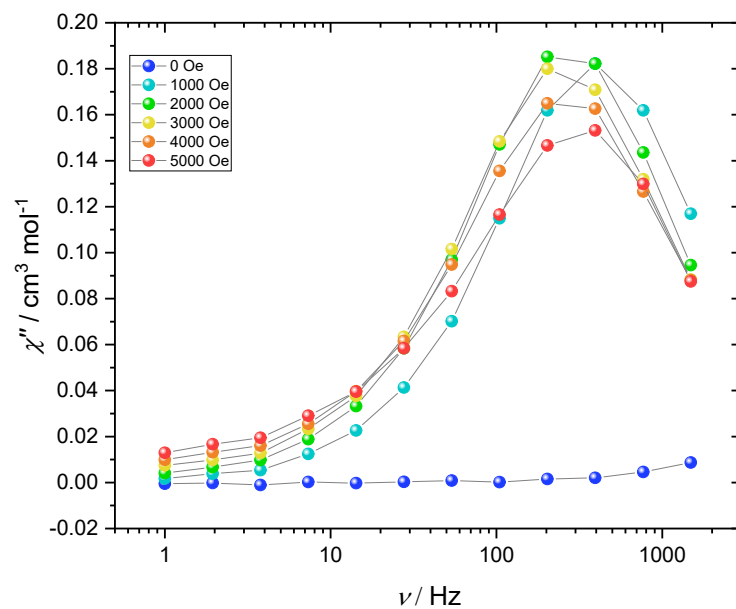

**Figure S26.** Field dependence of the out-of-phase signal of the ac magnetic susceptibility of **1**. Solid lines are guidelines for the eye.

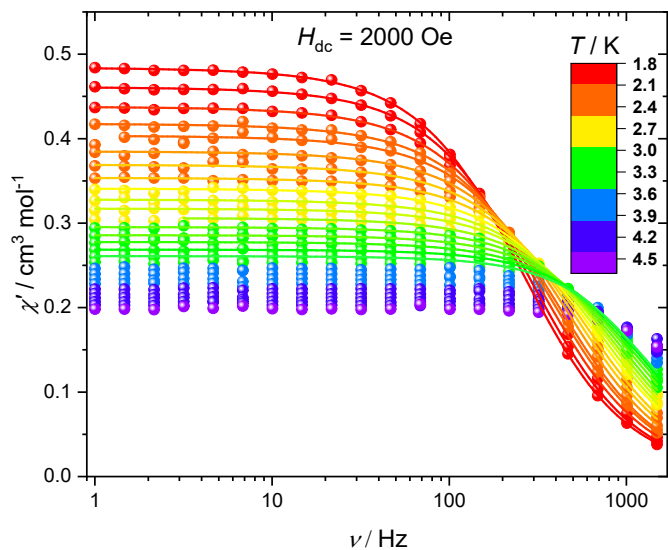

**Figure S27.** Temperature dependence of the in-phase signal of the ac susceptibility of **1**. Solid lines are best fits to the generalised Debye model as described in the main text. Parameters can be found in Table S4.

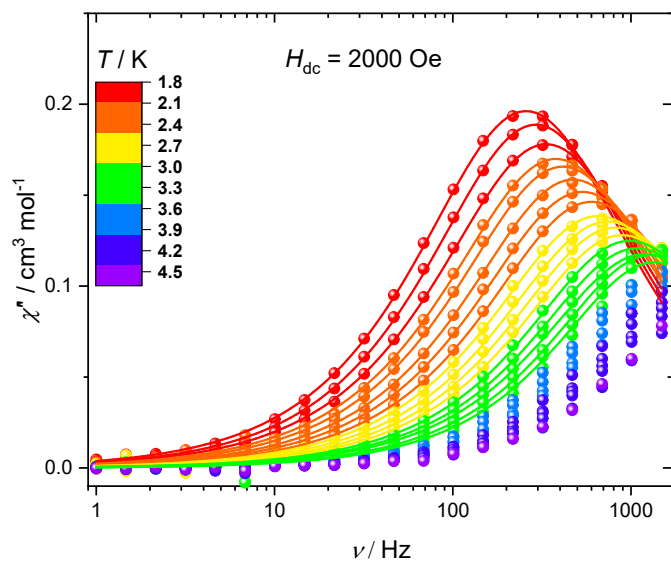

**Figure S28.** Temperature dependence of the out-of-phase signal of the ac susceptibility of **1**. Solid lines are best fits to the generalised Debye model as described in the main text. Parameters can be found in Table S4.

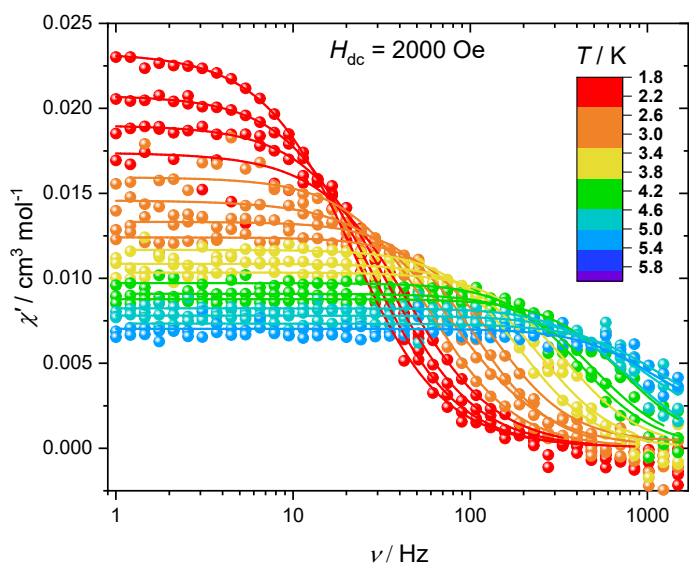

**Figure S29.** Temperature dependence of the in-phase signal of the ac susceptibility of **1'** at 4.8 % dilution. Solid lines are best fits to the generalised Debye model as described in the main text. Parameters can be found in Table S5.

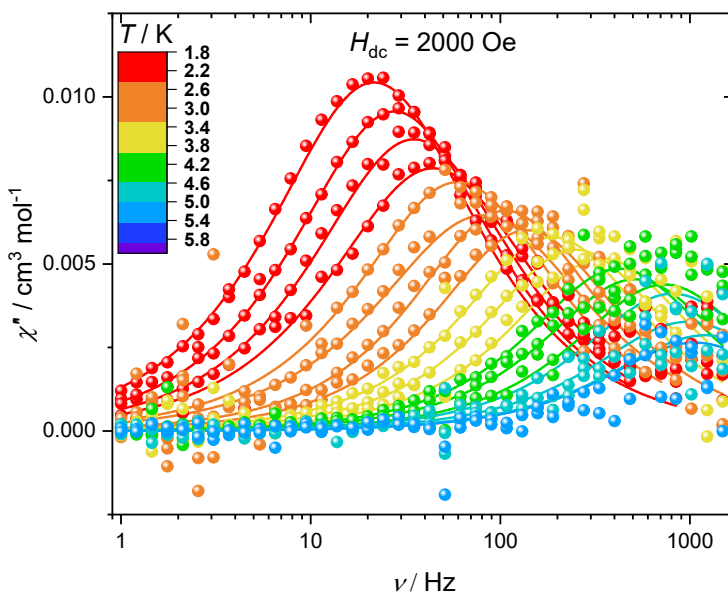

**Figure S30.** Temperature dependence of the out-of-phase signal of the ac susceptibility of **1'** at 4.8 % dilution. Solid lines are best fits to the generalised Debye model as described in the main text. Parameters can be found in Table S5.



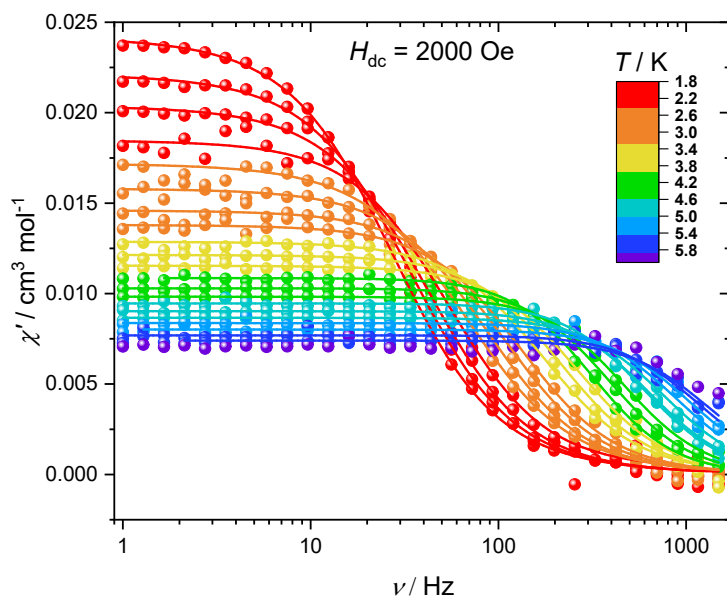

**Figure S31.** Temperature dependence of the in-phase signal of the ac susceptibility of **Yb@LuL** at 4.2 % dilution. Solid lines are best fits to the generalised Debye model as described in the main text. Parameters can be found in Table S6.

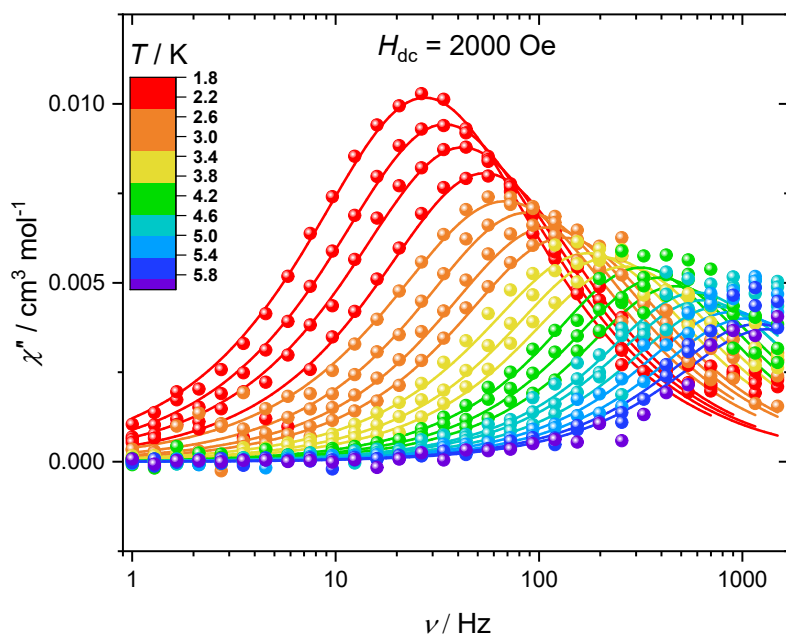

**Figure S32.** Temperature dependence of the out-of-phase signal of the ac susceptibility of **Yb@LuL** at 4.2 % dilution. Solid lines are best fits to the generalised Debye model as described in the main text. Parameters can be found in Table S6.

**Table S4.** Best fit parameters ( $\alpha$  and  $\tau$ ) for the generalised Debye model fitted to the temperature dependence of the ac magnetic susceptibility of **1** under an applied magnetic field of 2000 Oe.

| $T / \text{K}$ | $\tau / \text{ms}$ | $\alpha$ |
|----------------|--------------------|----------|
| 1.8            | 0.617              | 0.132502 |
| 1.9            | 0.545              | 0.126406 |
| 2.0            | 0.476              | 0.130576 |
| 2.1            | 0.420              | 0.130246 |
| 2.2            | 0.384              | 0.124550 |
| 2.3            | 0.336              | 0.122576 |
| 2.4            | 0.298              | 0.123392 |
| 2.5            | 0.266              | 0.119664 |
| 2.6            | 0.244              | 0.123105 |
| 2.7            | 0.215              | 0.120596 |
| 2.8            | 0.195              | 0.115392 |
| 2.9            | 0.178              | 0.113132 |
| 3.0            | 0.162              | 0.105940 |
| 3.1            | 0.148              | 0.102104 |
| 3.2            | 0.134              | 0.105400 |
| 3.3            | 0.123              | 0.087152 |
| 3.4            | 0.117              | 0.077580 |

**Table S5.** Best fit parameters ( $\alpha$  and  $\tau$ ) for the generalised Debye model fitted to the temperature dependence of the ac magnetic susceptibility of **1'** under an applied magnetic field of 2000 Oe.

| $T / \text{K}$ | $\tau / \text{ms}$ | $\alpha$ |
|----------------|--------------------|----------|
| 1.8            | 7.371              | 0.069869 |
| 2.0            | 5.751              | 0.052414 |
| 2.2            | 4.553              | 0.053690 |
| 2.4            | 3.611              | 0.063772 |
| 2.6            | 2.665              | 0.043237 |
| 2.8            | 1.975              | 0.077161 |
| 3.0            | 1.498              | 0.006180 |
| 3.2            | 1.152              | 0.000014 |
| 3.4            | 0.839              | 0.003826 |
| 3.6            | 0.639              | 0.000001 |
| 3.8            | 0.462              | 0.000000 |
| 4.0            | 0.378              | 0.004485 |
| 4.2            | 0.311              | 0.000000 |
| 4.4            | 0.217              | 0.000000 |
| 4.6            | 0.206              | 0.017066 |
| 4.8            | 0.164              | 0.017789 |
| 5.0            | 0.131              | 0.031950 |
| 5.2            | 0.151              | 0.000030 |

**Table S6.** Best fit parameters ( $\alpha$  and  $\tau$ ) for the generalised Debye model fitted to the temperature dependence of the ac magnetic susceptibility of **Yb@LuL** at 4.2% dilution under an applied magnetic field of 2000 Oe.

| $T / \text{K}$ | $\tau / \text{ms}$ | $\alpha$ |
|----------------|--------------------|----------|
| 1.8            | 5.793              | 0.108019 |
| 2.0            | 4.624              | 0.101124 |
| 2.2            | 3.783              | 0.094294 |
| 2.4            | 2.942              | 0.076802 |
| 2.6            | 2.340              | 0.105816 |
| 2.8            | 1.822              | 0.080573 |
| 3.0            | 1.440              | 0.069056 |
| 3.2            | 1.199              | 0.061864 |
| 3.4            | 0.911              | 0.063024 |
| 3.6            | 0.733              | 0.040777 |
| 3.8            | 0.602              | 0.035873 |
| 4.0            | 0.502              | 0.000114 |
| 4.2            | 0.407              | 0.000000 |
| 4.4            | 0.339              | 0.001090 |
| 4.6            | 0.269              | 0.000000 |
| 4.8            | 0.250              | 0.000000 |
| 5.0            | 0.208              | 0.000000 |
| 5.2            | 0.179              | 0.000000 |
| 5.4            | 0.152              | 0.000000 |
| 5.6            | 0.134              | 0.000000 |
| 5.8            | 0.120              | 0.000000 |

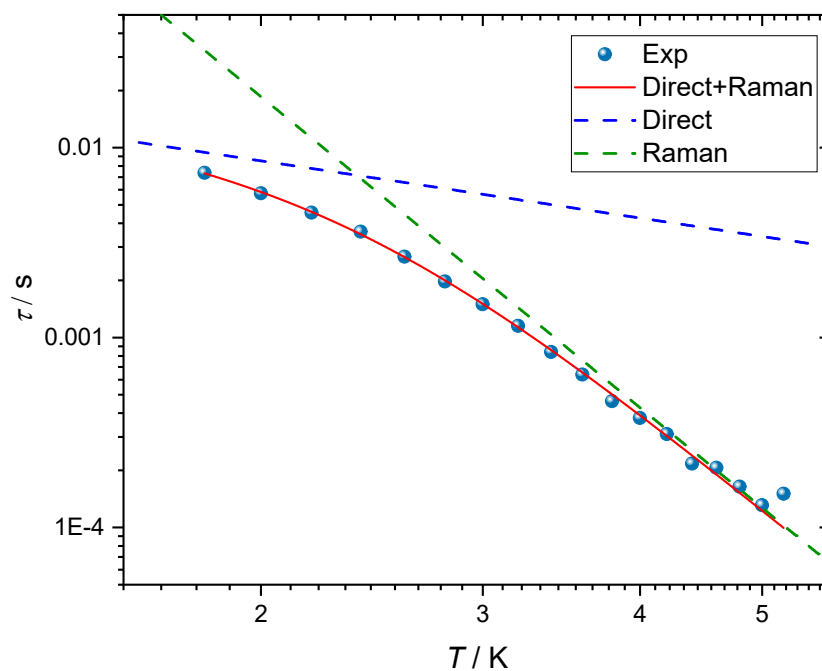

**Figure S33.** Relaxation times of  $1'$  at 4.8 % dilution as a function of temperature together with the best fit using a direct and Raman process as described in the main text.

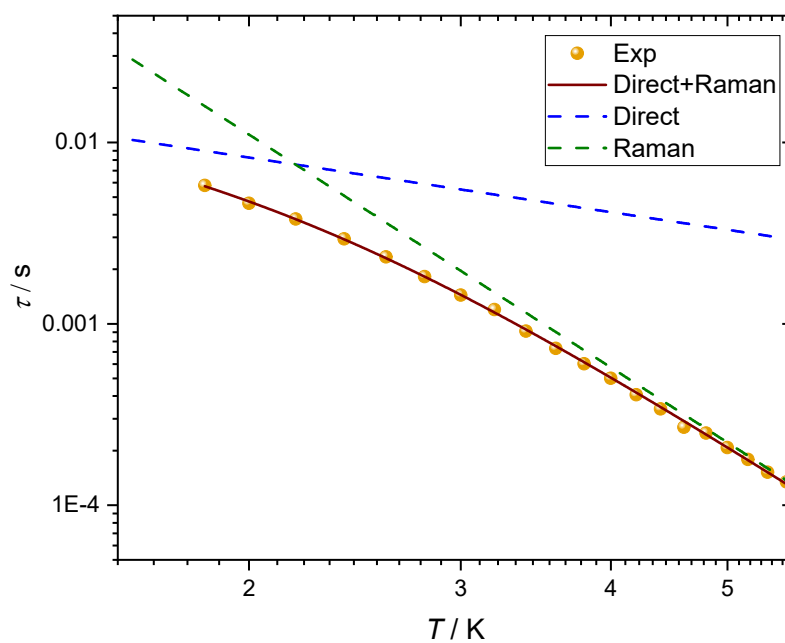

**Figure S34.** Relaxation time of  $\text{Yb@LuL}$  at 4.2% dilution as a function of temperature together with the best fit using a direct and Raman process as described in the main text.

1. Buch, C. D.; Hansen, S. H.; Tram, C. M.; Mitcov, D.; Piligkos, S., Functionalized Trigonal Lanthanide Complexes: A New Family of 4f Single-Ion Magnets. *Inorg Chem* **2020**, *59* (22), 16328-16340.
